# Supplementary material for: Future Scenarios as a Research Tool: Investigating Climate Change Impacts, Adaptation Options and Outcomes for the Great Barrier Reef, Australia
Source: PubMed Central journal article supplement — Hum Ecol Interdiscip J. 2013 Aug 24;41(6):841–57. doi: 10.1007/s10745-013-9601-0 (PMC3859889; doi:10.1007/s10745-013-9601-0), 2013-08-24
Supplement: 10745_2013_9601_MOESM1_ESM.pdf [file 10745_2013_9601_MOESM1_ESM.pdf]

**Supplementary material:** List of organisations invited to participate in this research. Respondents either attended a workshop in Townsville on 25<sup>th</sup> March 2011 or Cairns on 01 April 2011, or were interviewed before the end of April 2011. Some organisations were represented by more than one respondent.

| <b>Stakeholder organisation</b>                                      | <b>Participation (Y/N)</b> |
|----------------------------------------------------------------------|----------------------------|
| Agric-Science Queensland (DEEDI now QDAFF)                           | Y                          |
| Cairns and Far North Environment Centre (CAFNEC)                     | Y                          |
| Cairns Marine                                                        | Y                          |
| Cairns Regional Council                                              | Y                          |
| Commonwealth Scientific and Industrial Research Organisation (CSIRO) | Y                          |
| EcoFishers Queensland                                                | Y                          |
| Fisheries Research and Development Corporation (FRDC)                | Y                          |
| Fisheries Queensland (DEEDI now QDAFF)                               | Y                          |
| Great Barrier Reef Marine Park Authority (GBRMPA)                    | N                          |
| Mackay Tourism                                                       | Y                          |
| North Queensland Dry Tropics (NQDT)                                  | N                          |
| Ocean Watch                                                          | Y                          |
| Queensland Centre of Excellence for Climate Change (DERM now DEHP)   | Y                          |
| Queensland Parks and Wildlife Service (DERM now DEHP)                | Y                          |
|                                                                      |                            |
| Queensland Seafood Industry Association (QSIA)                       | Y                          |
| Queensland Tourism Industry Council (QTIC)                           | Y                          |
| Sunfish                                                              | Y                          |
| Terrain NRM                                                          | N                          |
| The Association of Marine Park Operators (AMPTO)                     | N                          |
| Traditional Owners                                                   | N                          |
| Tourism Queensland                                                   | Y                          |
| Tourism Whitsundays                                                  | N                          |
| Townsville City Council                                              | N                          |
| WWF Australia                                                        | N                          |

**Supplementary material:** Projections of climate change effects on coral reef and coastal ecosystems based on empirical observations of impacts from climate variability and extreme events.

| Climate change                            | Impact on ecosystems                                                                                                                                                                                                                                                                                                                                                                                                                                                                                                                                                                                                                                                                                                                                                                                                                                                                                                                                                                                                                                                                                                                                                                                                                                                                                                                                                                                                                                                                      | References                                                                                                                                                                                                                                                                          |
|-------------------------------------------|-------------------------------------------------------------------------------------------------------------------------------------------------------------------------------------------------------------------------------------------------------------------------------------------------------------------------------------------------------------------------------------------------------------------------------------------------------------------------------------------------------------------------------------------------------------------------------------------------------------------------------------------------------------------------------------------------------------------------------------------------------------------------------------------------------------------------------------------------------------------------------------------------------------------------------------------------------------------------------------------------------------------------------------------------------------------------------------------------------------------------------------------------------------------------------------------------------------------------------------------------------------------------------------------------------------------------------------------------------------------------------------------------------------------------------------------------------------------------------------------|-------------------------------------------------------------------------------------------------------------------------------------------------------------------------------------------------------------------------------------------------------------------------------------|
| Ocean warming                             | <p>Corals</p> <ul style="list-style-type: none"> <li>• Thermal tolerances of reef-building corals exceeded annually by ~2020</li> <li>• Increased frequency and intensity of coral bleaching and associated mortality (similar to 1998 event).</li> <li>• Heat-sensitive corals more susceptible</li> <li>• Survival and recovery possible, especially of fast-growing species, but reduced growth, calcification and fecundity, and greater incidence of disease.</li> <li>• Significant changes in community structure.</li> </ul> <p>Fish</p> <ul style="list-style-type: none"> <li>• Impacted by changes to coral habitats (cover and structure).</li> <li>• Coral-dependent species most heavily affected.</li> <li>• Coral-associated species experience lagged but long-term effects.</li> <li>• Herbivores and invertivores may benefit initially but will be affected in the long term by changes to reef structure.</li> <li>• Direct temperature effects may increase growth and productivity in some species (larval phases).</li> <li>• Increased variability in recruitment.</li> <li>• Already evidence of distributional shifts.</li> <li>• Unlikely temperature has lethal effects.</li> <li>• Changes to fish community composition.</li> <li>• Loss of biodiversity.</li> </ul> <p>Mangroves (air temperature increases)</p> <ul style="list-style-type: none"> <li>• Increased productivity and expanded ranges if temperatures do not exceed thresholds.</li> </ul> | <p>Hoegh-Guldberg, 1999<br/> Hughes et al., 2003<br/> Graham et al., 2006<br/> Graham et al., 2007<br/> Gilman et al., 2008<br/> Munday et al., 2008<br/> Pratchett et al., 2008<br/> Wilson et al., 2009<br/> Fulton 2011<br/> Pandolfi et al., 2011<br/> Anthony et al., 2012</p> |
| Acidification<br>(more impacts post-2050) | <p>Corals</p> <ul style="list-style-type: none"> <li>• Reduced calcification rates for corals and other calcifying organisms.</li> <li>• Decreased growth rate.</li> <li>• Reduced skeletal density. Greater risk of storm damage.</li> <li>• Possible erosion by reef grazing fish and invertebrates and decline in structural complexity.</li> <li>• Reduced potential for recovery</li> </ul> <p>Fish</p> <ul style="list-style-type: none"> <li>• Impacted by changes to coral habitats, as above.</li> <li>• Possible direct effects on fish embryos, larvae and juveniles</li> </ul>                                                                                                                                                                                                                                                                                                                                                                                                                                                                                                                                                                                                                                                                                                                                                                                                                                                                                                | <p>Hoegh-Guldberg et al., 2007<br/> Munday et al., 2008<br/> De'ath et al., 2009<br/> Pandolfi et al., 2011</p>                                                                                                                                                                     |

|                                 |                                                                                                                                                                                                                                                                                                                                                                                                                                                                                                                                                                                                                                                                                                                                                                                                                                                                                                                                                                                                                                                                                                                                                                                                                                                                                      |                                                                                                                                                                                                                                                                                               |
|---------------------------------|--------------------------------------------------------------------------------------------------------------------------------------------------------------------------------------------------------------------------------------------------------------------------------------------------------------------------------------------------------------------------------------------------------------------------------------------------------------------------------------------------------------------------------------------------------------------------------------------------------------------------------------------------------------------------------------------------------------------------------------------------------------------------------------------------------------------------------------------------------------------------------------------------------------------------------------------------------------------------------------------------------------------------------------------------------------------------------------------------------------------------------------------------------------------------------------------------------------------------------------------------------------------------------------|-----------------------------------------------------------------------------------------------------------------------------------------------------------------------------------------------------------------------------------------------------------------------------------------------|
| Variable rainfall               | <ul style="list-style-type: none"> <li>• Increased incidence of floods and droughts</li> <li>• Increased exposure to freshwater run-off during flood events</li> <li>• Potential exposure to nutrient-enriched water</li> <li>• Potential exposure to increased siltation</li> </ul> <p>Corals (where nutrient and siltation loads increase)</p> <ul style="list-style-type: none"> <li>• Increased sensitivity to bleaching</li> <li>• Promotes algal growth in contexts of reduced grazing</li> <li>• Reduced potential for recovery</li> </ul> <p>Fish (where run-off and nutrient loads increase)</p> <ul style="list-style-type: none"> <li>• Potential increases in planktonic food availability in inshore reefs</li> <li>• Increased abundance of estuarine species, e.g., barramundi, mud crab.</li> </ul> <p>Mangroves and seagrasses</p> <ul style="list-style-type: none"> <li>• Expected to impact mangrove growth and spatial distribution. Decreased precipitation could decrease productivity, growth and seedling survival leading to composition change, diversity loss, and reduced mangrove area. Increased rainfall could increase growth, area, and diversity of species.</li> <li>• Declining water quality identified as a cause of seagrass loss</li> </ul> | <p>Robins et al., 2005<br/> Mumby et al., 2006<br/> Hoegh-Guldberg et al. 2007<br/> McKinnon et al. 2007<br/> Munday et al., 2008<br/> Gilman et al., 2008<br/> Waycott et al., 2009<br/> Wooldridge, 2009<br/> Gillson, 2011<br/> Pandolfi et al., 2011<br/> Marshall and Marshall, 2012</p> |
| Increased intensity of cyclones | <ul style="list-style-type: none"> <li>• Impacts are highly localized</li> </ul> <p>Corals</p> <ul style="list-style-type: none"> <li>• Coral cover loss (more than bleaching events)</li> <li>• Increase in algal cover.</li> <li>• Upheaval or displacement of large coral heads.</li> <li>• Recovery on exposed sites is slow.</li> </ul> <p>Fish</p> <ul style="list-style-type: none"> <li>• Temporary decline of some reef-associated species though evidence is mixed (no decline in Coral Trout abundance following TC Hamish).</li> <li>• Some increase in abundance of scavengers.</li> <li>• Temporary increase in biodiversity in some cases.</li> <li>• Decline in Coral Trout catches (~ 30% following TC Hamish).</li> <li>• Recovery possible, but takes up to a year.</li> </ul> <p>Mangroves</p> <ul style="list-style-type: none"> <li>• Increased damage through defoliation and tree mortality.</li> <li>• Affected by soil erosion and deposition.</li> </ul>                                                                                                                                                                                                                                                                                                  | <p>Gilman et al., 2008<br/> Munday et al., 2008<br/> Wilson et al., 2009<br/> Tobin et al., 2010<br/> Sweetman et al., 2011<br/> Woolsey et al., 2012<br/> Marshall and Marshall, 2012</p>                                                                                                    |

|                |                                                                                                                                                                                                                                                                                                                                                                                                                                                                                                                                                                |                                                                                                              |
|----------------|----------------------------------------------------------------------------------------------------------------------------------------------------------------------------------------------------------------------------------------------------------------------------------------------------------------------------------------------------------------------------------------------------------------------------------------------------------------------------------------------------------------------------------------------------------------|--------------------------------------------------------------------------------------------------------------|
| Sea-level rise | <p>Corals</p> <ul style="list-style-type: none"> <li>• Reefs may ‘drown’ under rapid SLR (~0.5m by 2100)</li> </ul> <p>Fish</p> <ul style="list-style-type: none"> <li>• Unlikely to be affected by SLR &lt;1m</li> </ul> <p>Coastal habitat</p> <ul style="list-style-type: none"> <li>• General decline in wetland communities</li> <li>• Identified as the greatest climate change-related threat to area and health of mangroves and other tidal wetlands</li> <li>• Mangroves able to migrate inland if not constrained by coastal development</li> </ul> | <p>Hoegh-Guldberg et al. 2007<br/> Gilman et al., 2008<br/> Munday et al., 2008<br/> Traill et al., 2011</p> |
|----------------|----------------------------------------------------------------------------------------------------------------------------------------------------------------------------------------------------------------------------------------------------------------------------------------------------------------------------------------------------------------------------------------------------------------------------------------------------------------------------------------------------------------------------------------------------------------|--------------------------------------------------------------------------------------------------------------|

**Supplementary material:** References for the 253 articles reviewed for the development of alternative future scenarios for the Great Barrier Reef.

|                                                                                                                                                                                                                                                                                                                                                                                                                               |
|-------------------------------------------------------------------------------------------------------------------------------------------------------------------------------------------------------------------------------------------------------------------------------------------------------------------------------------------------------------------------------------------------------------------------------|
| Abal, E.G. and Dennison, W.C., 1996. Seagrass depth range and water quality in southern Moreton Bay, Queensland, Australia. <i>Marine and Freshwater Research</i> , <b>47</b> (6), 763- 772                                                                                                                                                                                                                                   |
| Access Economics, 2007. Measuring the economic and financial value of the Great Barrier Reef Marine Park 2005/6. Report by Access Economics Pty Ltd for the Great Barrier Reef Marine Park Authority, Townsville.                                                                                                                                                                                                             |
| Adger, W.N. and Vincent, K., 2005. Uncertainty in adaptive capacity. <i>Comptes Rendus Geosciences</i> , <b>337</b> (4), 399–410.                                                                                                                                                                                                                                                                                             |
| Adger, W.N. et al., 2005. Successful adaptation to climate change across scales. <i>Global Environmental Change</i> <b>15</b> : 77–86                                                                                                                                                                                                                                                                                         |
| Adger, W.N. et al., 2007. Assessment of adaptation practices, options, constraints and capacity. <i>Climate change</i> , 717–743.                                                                                                                                                                                                                                                                                             |
| Adger, W.N. et al., 2009. Are there social limits to adaptation to climate change? <i>Climatic Change</i> , <b>93</b> (3), 335–354.                                                                                                                                                                                                                                                                                           |
| Alexander, L. et al., 2007. Trends in Australia’s climate means and extremes: a global context. <i>Australian Meteorological Magazine</i> , <b>56</b> (1), 1–18.                                                                                                                                                                                                                                                              |
| Allan, R. et al., 1996. Mean sea level pressure indices of the El Nino-Southern Oscillation: relevance to stream discharge in south-eastern Australia. <i>Divisional Report, CSIRO Division of Water Resources</i> . Available here <a href="http://direct.bl.uk/bld/PlaceOrder.do?UIN=010073674&amp;ETOC=RN&amp;from=searchengine">http://direct.bl.uk/bld/PlaceOrder.do?UIN=010073674&amp;ETOC=RN&amp;from=searchengine</a> |
| Anthony, K. R. N., et al., 2012. Ocean acidification and warming will lower coral reef resilience. <i>Global Change Biology</i> . <b>17</b> (5): 1798-1808                                                                                                                                                                                                                                                                    |
| Aubé, C.I., Locke, A. and Klassen, G.J., 2005. Zooplankton communities of a dammed estuary in the Bay of Fundy, Canada. <i>Hydrobiologia</i> , <b>548</b> (1), 127–139.                                                                                                                                                                                                                                                       |
| Baldwin, A. et al., 2001. Regeneration in fringe mangrove forests damaged by Hurricane Andrew. <i>Plant Ecology</i> , <b>157</b> (2), 151–164.                                                                                                                                                                                                                                                                                |
| Barnett, J. and O'Neill, S. 2009. Maladaptation. <i>Global Environmental Change</i> , In press.                                                                                                                                                                                                                                                                                                                               |
| Barnett, T. et al., 2005. Penetration of human-induced warming into the world's oceans. <i>Science</i> , <b>309</b> (5732), 284                                                                                                                                                                                                                                                                                               |
| Baskett, M. L., et al., 2009. Symbiont diversity may help coral reefs survive moderate climate change. <i>Ecological Applications</i> , <b>19</b> (1): 3–17                                                                                                                                                                                                                                                                   |
| Baskett, M.L. et al., 2010. Conservation management approaches to protecting the capacity for corals to respond to climate change: a theoretical comparison. <i>Global Change Biology</i> , <b>16</b> (4), 1229-1246.                                                                                                                                                                                                         |
| Bassim, K., Sammarco, P. Snell, T. 2002. Effects of temperature on success of (self and non-self) fertilization and embryogenesis in <i>Diploria strigosa</i> (Cnidaria, Scleractinia). <i>Marine Biology</i> , <b>140</b> (3), 479–488.                                                                                                                                                                                      |
| Becken, S., 2005. Harmonising climate change adaptation and mitigation: The case of tourist resorts in Fiji. <i>Global Environmental Change Part A</i> , <b>15</b> (4), 381–393.                                                                                                                                                                                                                                              |
| Beebe, N.W. et al., 2009. Australia's Dengue Risk Driven by Human Adaptation to Climate Change D. Gubler, ed. <i>PLoS Neglected Tropical Diseases</i> , <b>3</b> (5), e429.                                                                                                                                                                                                                                                   |
| Berkelmans, R. and Van Oppen, M.J., 2006. The role of zooxanthellae in the thermal tolerance of corals: a ‘nugget of hope’ for coral reefs in an era of climate change. <i>Proceedings of the Royal Society B: Biological Sciences</i> , <b>273</b> (1599), 2305.                                                                                                                                                             |
| Berkelmans, R. et al., 2004. A comparison of the 1998 and 2002 coral bleaching events on the Great Barrier Reef: spatial correlation, patterns, and predictions. <i>Coral Reefs</i> , <b>23</b> (1), 74–83.                                                                                                                                                                                                                   |
| Bertness, M.D. and Ewanchuk, P.J., 2002. Latitudinal and climate-driven variation in the strength and nature of biological interactions in New England salt marshes. <i>Oecologia</i> , <b>132</b> (3), 392–401.                                                                                                                                                                                                              |
| Beukers, J.S. and Jones, G.P., 1998. Habitat complexity modifies the impact of piscivores on a coral reef fish population. <i>Oecologia</i> , <b>114</b> (1), 50–59                                                                                                                                                                                                                                                           |

|                                                                                                                                                                                                                                                                                                                                    |
|------------------------------------------------------------------------------------------------------------------------------------------------------------------------------------------------------------------------------------------------------------------------------------------------------------------------------------|
| Biesbroek, G. et al., 2009. Institutional governance barriers for the development and implementation of climate adaptation strategies. Working paper for the International Human Dimensions Programme (IHDP) conference “Earth System Governance: People, Places, and the Planet”, December 2-4, Amsterdam, the Netherlands, 1-14. |
| Bigano, A. et al., 2006. Economy-wide estimates of the implications of climate change: A joint analysis for sea level rise and tourism. <i>Nota di lavoro</i> , <b>135</b> .                                                                                                                                                       |
| Birch, W.R. and Birch, M., 1984. Succession and pattern of tropical intertidal seagrasses in Cockle Bay, Queensland, Australia: a decade of observations. <i>Aquatic Botany</i> , <b>19</b> (3-4), 343–367.                                                                                                                        |
| Bjarnadottir, S., Li, Y., and Stewart, M. G., 2011. Social vulnerability index for coastal communities at risk to hurricane hazard and a changing climate. <i>Natural Hazards</i> <b>59</b> :1055–1075                                                                                                                             |
| Boersma, P.D., 1998. Population trends of the Galapagos penguin: impacts of El Nino and La Nina. <i>Condor</i> , <b>100</b> (2), 245–253.                                                                                                                                                                                          |
| Bohensky, E., et al., 2011. Future makers or future takers? A scenario analysis of climate change and the Great Barrier Reef. <i>Global Environmental Change</i> <b>21</b> : 876-893                                                                                                                                               |
| Bohnet, I., et al., 2008. <i>Future scenarios for the Great Barrier Reef Catchment. Final Project Report</i> . CSIRO. Water for a Health Country National Research Flagship. pp 56.                                                                                                                                                |
| Bosello, F., Roson, R. and Tol, R. 2006. Economy-wide estimates of the implications of climate change: Human health. <i>Ecological Economics</i> , <b>58</b> (3), 579–591.                                                                                                                                                         |
| Bowden-Kerby, A., 1997. Coral transplantation in sheltered habitats using unattached fragments and cultured colonies. In <i>Proc. 8th Int. Coral Reef Symp.</i> pp. 2063–2068                                                                                                                                                      |
| Brander, K.M., 2007. Global fish production and climate change. <i>PNAS</i> , <b>104</b> (50), 19709–19714                                                                                                                                                                                                                         |
| BRANZ Ltd 2007, An Assessment of the Need to Adapt Buildings for the Unavoidable Consequences of Climate Change, report to the Australian Greenhouse Office, Commonwealth of Australia, Canberra.                                                                                                                                  |
| Brierley, A. Kingsford, M. 2009. Impacts of Climate Change on Marine Organisms and Ecosystems. <i>Current Biology</i> , <b>19</b> (14), R602-R614.                                                                                                                                                                                 |
| Brohan, P. et al., 2006. Uncertainty estimates in regional and global observed temperature changes: a new dataset from 1850. <i>J. Geophys. Res.</i> , <b>111</b> (D12).                                                                                                                                                           |
| Brown, K., 2002. Innovations for conservation and development. <i>Geographical Journal</i> , <b>168</b> (1), 6–17                                                                                                                                                                                                                  |
| Brown, B.E., 1997. Adaptations of reef corals to physical environmental stress. <i>Advances in Marine Biology</i> , <b>31</b> , 221–299.                                                                                                                                                                                           |
| Buddemeier, R.W. & Fautin, D.G., 1993. Coral bleaching as an adaptive mechanism. <i>Bioscience</i> , <b>43</b> (5), 320–326.                                                                                                                                                                                                       |
| Burton, I., Kates, R.W. & White, G.F., 1993. <i>The environment as hazard</i> , Oxford University Press New York, pp240                                                                                                                                                                                                            |
| Cahoon, D.R., Day Jr, J.W. and Reed, D.J., 1999. The influence of surface and shallow subsurface soil processes on wetland elevation: A synthesis. <i>Current Topics in Wetland Biogeochemistry</i> <b>3</b> , 72–88.                                                                                                              |
| Cai, W. et al., 2005. The response of the Southern Annular Mode, the East Australian Current, and the southern mid-latitude ocean circulation to global warming. <i>Geophysical Research Letters</i> , <b>32</b> (23), 1–4.                                                                                                        |
| Campbell, S.J. and McKenzie, L.J., 2004. Flood related loss and recovery of intertidal seagrass meadows in southern Queensland, Australia. <i>Estuarine, Coastal and Shelf Science</i> , <b>60</b> (3), 477–490.                                                                                                                   |
| Cao, L. et al., 2007. Effects of carbon dioxide and climate change on ocean acidification and carbonate mineral saturation. <i>Geophysical Research Letters</i> , <b>34</b> (5), 5607.                                                                                                                                             |
| Cheeseman, J.M. et al., 1997. Photosynthesis and photoprotection in mangroves under field conditions. <i>Plant, Cell &amp; Environment</i> , <b>20</b> (5), 579–588.                                                                                                                                                               |

|                                                                                                                                                                                                                                                                                                                             |
|-----------------------------------------------------------------------------------------------------------------------------------------------------------------------------------------------------------------------------------------------------------------------------------------------------------------------------|
| Chin, A. and Kyne, P. 2007. Vulnerability of Chondrichthyan fishes of the Great Barrier Reef to climate change. <i>Climate Change and the Great Barrier Reef, Great Barrier Reef Marine Park Authority and Australian Greenhouse Office, Townsville, Australia</i> , 393–425.                                               |
| Church, J. and White, N. 2006. A 20th century acceleration in global sea-level rise. <i>Geophysical Research Letters</i> , <b>33</b> (1), L01602.                                                                                                                                                                           |
| Cinner, J.E. et al., 2009. Gear-based fisheries management as a potential adaptive response to climate change and coral mortality. <i>Journal of Applied Ecology</i> , <b>46</b> (3), 724–732.                                                                                                                              |
| Claiborne, J.B., Edwards, S.L. & Morrison-Shetlar, A.I., 2002. Acid–base regulation in fishes: cellular and molecular mechanisms. <i>Journal of Experimental Zoology</i> , <b>293</b> (3), 302–319.                                                                                                                         |
| Clark, S. and Edwards, A.J., 1995. Coral transplantation as an aid to reef rehabilitation: evaluation of a case study in the Maldive Islands. <i>Coral Reefs</i> , <b>14</b> (4), 201–213.                                                                                                                                  |
| Clewett, J. and Clarkson, N. 2007. Influence of the El Nino-Southern Oscillation on climate risk and native pastures in the northern Murray-Darling Basin. <i>Tropical Grasslands</i> , <b>41</b> (3), 203.                                                                                                                 |
| Clough, B. and Sim, R. 1989. Changes in gas exchange characteristics and water use efficiency of mangroves in response to salinity and vapour pressure deficit. <i>Oecologia</i> , <b>79</b> (1), 38–44.                                                                                                                    |
| Coles, S.L. and Brown, B.E., 2003. Coral bleaching–capacity for acclimatization and adaptation. <i>Advances in marine biology</i> <b>46</b> , 183–223.                                                                                                                                                                      |
| Commonwealth of Australia, 2006. <i>Review of the Great Barrier Reef Marine Park Act 1975: Review Panel Report</i> , Canberra: Department of Environment and Heritage.                                                                                                                                                      |
| Congdon, B. et al., 2007. Vulnerability of seabirds on the Great Barrier Reef to climate change. Marshall, P. and J. Johnson. Great Barrier Reef ecological vulnerability assessment. Great Barrier Reef Marine Park Authority. Townsville, Australia, 427–463.                                                             |
| Cooper, T. et al., 2008. Declining coral calcification in massive Porites in two nearshore regions of the northern Great Barrier Reef. <i>Global Change Biology</i> , <b>14</b> (3), 529–538.                                                                                                                               |
| Crick, H.Q. et al., 1995. UK birds are laying eggs earlier. <i>Func. Ecol</i> , <b>9</b> , 55–60.                                                                                                                                                                                                                           |
| Cunningham S. 2006. Conclusions: factors for success in fisheries management. In: Cunningham S, Bostock T, editors. <i>Successful Fisheries Management</i> . Delft, The Netherlands: Eburon; 2005. p. 233–7.                                                                                                                |
| Dawson, J. and Smithers, S. 2010. Shoreline and beach volume change between 1967 and 2007 at Raine Island, Great Barrier Reef, Australia. <i>Global and Planetary Change</i> . <b>72</b> (3): 141-154                                                                                                                       |
| De'ath, G., Lough, J., and Fabricius, K. E., 2009. Declining coral calcification on the Great Barrier Reef. <i>Science</i> <b>323</b> (5910): 116-119                                                                                                                                                                       |
| Department of the Environment, Water, Heritage and the Arts. 2005. <i>Assessment of the Coral Reef Finfish Fishery</i> . Commonwealth of Australia.                                                                                                                                                                         |
| Dessai, S. et al., 2004. Defining and experiencing dangerous climate change. <i>Climatic Change</i> , <b>64</b> (1), 11–25.                                                                                                                                                                                                 |
| Dessai, S. et al., 2008. Climate prediction: a limit to adaptation. <i>Living with climate change: are there limits to adaptation</i> , 49–57                                                                                                                                                                               |
| Diaz, R. Rosenberg, R. 2008. Spreading dead zones and consequences for marine ecosystems. <i>Science</i> , <b>321</b> (5891), 926.                                                                                                                                                                                          |
| Devlin, M., et al., 2001. <i>Flood plumes in the Great Barrier Reef: spatial and temporal patterns in composition and distribution</i> . Research publication 68, Great Barrier Reef Marine Park Authority, Townsville, Australia                                                                                           |
| Diaz-Pulido, G. et al., 2007. <i>Vulnerability of macroalgae of the Great Barrier Reef to climate change</i> . Climate change and the Great Barrier Reef. Townsville: Great Barrier Reef Marine Park Authority & Australian Greenhouse Office, 153–192.                                                                     |
| Done, T et al., 2003. <i>Global climate change and coral bleaching on the Great Barrier Reef</i> . Department of Natural Resources and Mines, Queensland, Australia (available at <a href="http://www.nrm.qld.gov.au/science/pdf/barrier_reef_report_1.pdf">www.nrm.qld.gov.au/science/pdf/barrier_reef_report_1.pdf</a> ). |
| Doria, M.D.F. et al., 2009. Using expert elicitation to define successful adaptation to climate change. <i>Environmental Science &amp; Policy</i> <b>12</b> (7), 810-819.                                                                                                                                                   |

|                                                                                                                                                                                                                                                                |
|----------------------------------------------------------------------------------------------------------------------------------------------------------------------------------------------------------------------------------------------------------------|
| Dowdeswell, J. 2006. The Greenland Ice Sheet and global sea-level rise. <i>Science</i> <b>311</b> (5763), 963–964.                                                                                                                                             |
| Duarte, C.M., 1999. Seagrass ecology at the turn of the millennium: challenges for the new century. <i>Aquatic Botany</i> , <b>65</b> (1-4), 7–20.                                                                                                             |
| Edmunds, P. 2005. The effect of temperature on the size and population density of dinoflagellates in larvae of the reef coral <i>Porites astreoides</i> . <i>Invertebrate Biology</i> , <b>124</b> (3), 185–193.                                               |
| Ellison, J.C., 1999. Impacts of sediment burial on mangroves. <i>Marine Pollution Bulletin</i> , <b>37</b> (8-12), 420–426.                                                                                                                                    |
| Ellison, J. and Stoddart, D. 1991. Mangrove ecosystem collapse during predicted sea-level rise: Holocene analogues and implications. <i>Journal of Coastal Research</i> , <b>7</b> (1) 151–165.                                                                |
| Emanuel, K., 2005. Increasing destructiveness of tropical cyclones over the past 30 years. <i>Nature</i> , <b>436</b> (7051), 686–688.                                                                                                                         |
| Epstein, N., Bak, R.P.M. and Rinkevich, B., 2001. Strategies for Gardening Denuded Coral Reef Areas: The Applicability of Using Different Types of Coral Material for Reef Restoration. <i>Restoration Ecology</i> , <b>9</b> (4), 432-442.                    |
| Epstein, N., Bak, R.P.M. and Rinkevich, B., 2003. Applying forest restoration principles to coral reef rehabilitation. <i>Aquatic Conservation: Marine and Freshwater Ecosystems</i> , <b>13</b> (5), 387–395.                                                 |
| Fabricius, K. et al., 2007. <i>Vulnerability of coral reefs of the Great Barrier Reef to climate change</i> . Climate Change and the Great Barrier Reef: A Vulnerability Assessment. Great Barrier Reef Marine Park Authority, Townsville, Australia, 515–554. |
| Feely, R. et al., 2004. Impact of anthropogenic CO <sub>2</sub> on the CaCO <sub>3</sub> system in the oceans. <i>Science</i> , <b>305</b> (5682), 362                                                                                                         |
| Fenton, M. et al., 2007. Climate change and the Great Barrier Reef: industries and communities. Great Barrier Reef Marine Park Authority and the Green house Office, Australia                                                                                 |
| Fenton, D.M. and Beeden, R., 2006. Stakeholder beliefs about climate change in the Great Barrier Reef catchment, Report to the Great Barrier Reef Marine Park Authority, Townsville.                                                                           |
| Fischlin, A. et al., 2007. Ecosystems, their properties, goods and services. <i>Notes</i> .                                                                                                                                                                    |
| Fonseca, M.S., Kenworthy, W.J. and Thayer, G.W., 1998. Guidelines for the conservation and restoration of seagrasses in the United States and adjacent waters, US Dept. of Commerce, National Oceanic and Atmospheric Administration, Coastal Ocean Office.    |
| Fuentes, M. et al., 2010. Potential impacts of projected sea-level rise on sea turtle rookeries. <i>Aquatic Conservation: Marine and Freshwater Ecosystems</i> , <b>20</b> (2), 132-139.                                                                       |
| Fulton, E. A., 2011. Interesting times: winners, losers, and system shifts under climate change around Australia. <i>ICES Journal of Marine Science</i> <b>68</b> (6): 1329–1342                                                                               |
| Furnas, M. 2003. <i>Catchments and corals: terrestrial runoff to the Great Barrier Reef</i> . Australian Institute of Marine Science and Reef CRC, Townsville                                                                                                  |
| French, P.W., 2006. Managed realignment-The developing story of a comparatively new approach to soft engineering. <i>Estuarine, Coastal and Shelf Science</i> , <b>67</b> (3), 409–423.                                                                        |
| Gagliano, M. et al., 2010. The basics of acidification: baseline variability of pH on Australian coral reefs. <i>Marine Biology</i> , <b>157</b> (8), 1849-1856.                                                                                               |
| Garcia, H. et al., 2005. On the variability of dissolved oxygen and apparent oxygen utilization content for the upper world ocean: 1955 to 1998. <i>Geophys. Res. Lett.</i> , <b>32</b> , 9604.                                                                |
| Garnaut, R., The Garnaut climate change review. <i>Global Environmental change</i> , <b>13</b> , 1–5.                                                                                                                                                          |
| Gates, R.D. and Edmunds, P.J., 1999. The physiological mechanisms of acclimatization in tropical reef corals. <i>Integrative and Comparative Biology</i> , <b>39</b> (1), 30.                                                                                  |
| Gilbert, M. and Brodie J. 2001. <i>Population and major land use in the Great Barrier Reef Catchment area: spatial and temporal trends</i> . Great Barrier Reef Marine Park Authority, Townsville, Queensland.                                                 |
| Gilman, E.L. et al., 2008. Threats to mangroves from climate change and adaptation options:                                                                                                                                                                    |



|                                                                                                                                                                                                                                                                                                                                                    |
|----------------------------------------------------------------------------------------------------------------------------------------------------------------------------------------------------------------------------------------------------------------------------------------------------------------------------------------------------|
| A review. <i>Aquatic Botany</i> , <b>89</b> (2), 237–250.                                                                                                                                                                                                                                                                                          |
| Global Coral Reef Monitoring Network 2008. Status of coral reefs of the world.                                                                                                                                                                                                                                                                     |
| GBRMPA, 2009. 'bleach watch' Program description available online at <a href="http://www.gbrmpa.gov.au/corp_site/key_issues/climate_change/management_responses/bleach_watch2.html/existing_participants.html">http://www.gbrmpa.gov.au/corp_site/key_issues/climate_change/management_responses/bleach_watch2.html/existing_participants.html</a> |
| Grafton, R. et al., 2006. Incentive-based approaches to sustainable fisheries. <i>Canadian Journal of Fisheries and Aquatic Sciences</i> , <b>63</b> (3): 699-710                                                                                                                                                                                  |
| Graham, N.A. et al., 2006. Dynamic fragility of oceanic coral reef ecosystems. <i>PNAS</i> , <b>103</b> (22), 8425–8429.                                                                                                                                                                                                                           |
| Granek, E.F. et al., 2008. Engaging recreational fishers in management and conservation: global case studies. <i>Conservation Biology</i> , <b>22</b> (5), 1125–1134.                                                                                                                                                                              |
| Great Barrier Reef Marine Park Authority, 2006. Reef Manager's Guide to Coral Bleaching, Townsville: Great Barrier Reef Marine Park Authority.                                                                                                                                                                                                     |
| Green, E.P., Short, F.T. et al., 2003. World atlas of seagrasses, University of California Press Berkeley, CA.                                                                                                                                                                                                                                     |
| Gregory, J. Huybrechts, P. and Raper, S. 2004. Climatology: Threatened loss of the Greenland ice-sheet. <i>Nature</i> , <b>428</b> (6983), 616.                                                                                                                                                                                                    |
| Grosberg, R., 1988. Life-history variation within a population of the colonial ascidian <i>Botryllus schlosseri</i> . I. The genetic and environmental control of seasonal variation. <i>Evolution</i> , <b>42</b> (5), 900–920.                                                                                                                   |
| Gunn, J., Fraser, G., and Kimball, B., 2010. <i>Review of the Great Barrier Reef Marine Park Structural Adjustment Package</i> . Report for the Department of Environment, Water, Heritage and the Arts (DEWHA). 129 pp                                                                                                                            |
| Hall, W.B. et al., 1998. Climate Change in Queensland's Grazing Lands: Ii. An Assessment of the Impact on Animal Production from Native Pastures. <i>The Rangeland Journal</i> , <b>20</b> (2), 177–208                                                                                                                                            |
| Hamann, M., Limpus, C. and Read, M. 2007. Vulnerability of marine reptiles in the Great Barrier Reef to climate change. <i>Climate Change and the Great Barrier Reef: A Vulnerability Assessment</i> , pp 667–716.                                                                                                                                 |
| Hammer, G. Nicholls, N. and Mitchell, C. 2000. Applications of seasonal climate forecasting in agricultural and natural ecosystems, Springer Netherlands. Pp 36-39.                                                                                                                                                                                |
| Hansen, J. et al., 2006. Global temperature change. <i>Proceedings of the National Academy of Sciences</i> , <b>103</b> (39), 14288.                                                                                                                                                                                                               |
| Harvey, N. et al., 1999. Holocene sea-level change at Port Pirie, South Australia: A contribution to global sea-level rise estimates from tide gauges. <i>Journal of Coastal Research</i> , <b>15</b> (3), 607–615.                                                                                                                                |
| Haynes, D. et al., 2007. Assessment of the water quality and ecosystem health of the Great Barrier Reef (Australia): conceptual models. <i>Environmental Management</i> , <b>40</b> (6), 993–1003                                                                                                                                                  |
| Haynes, D., Müller, J. and Carter, S., 2000. Pesticide and herbicide residues in sediments and seagrasses from the Great Barrier Reef World Heritage Area and Queensland coast. <i>Marine Pollution Bulletin</i> , <b>41</b> (7-12), 279–287.                                                                                                      |
| Hennessy, K. et al., 2006. Climate change scenarios for initial assessment of risk in accordance with risk management guidance, CSIRO Marine & Atmospheric Research. Book. Available online at <a href="http://en.scientificcommons.org/51837059">http://en.scientificcommons.org/51837059</a>                                                     |
| Hetherington, R. and Reid, R. 2003. Malacological insights into the marine ecology and changing climate of the late Pleistocene–early Holocene Queen Charlotte Islands archipelago, western Canada, and implications for early peoples. <i>Canadian Journal of Zoology</i> , <b>81</b> (4), 626–661.                                               |
| Hobday, A. J., 2011. Sliding baselines and shuffling species: implications of climate change for marine conservation. <i>Marine Ecology</i> <b>32</b> : 392–403                                                                                                                                                                                    |
| Hobday, A. J., et al., 2006. <i>Impacts of climate change on Australian marine life: Part C. Literature Review</i> . Report to the Australian Greenhouse Office, Canberra, Australia.                                                                                                                                                              |

|                                                                                                                                                                                                                                                                                                                                     |
|-------------------------------------------------------------------------------------------------------------------------------------------------------------------------------------------------------------------------------------------------------------------------------------------------------------------------------------|
| Hobday, A. J., Poloczanska, E. S., and Mearns, R. J., (eds) 2008. <i>Implications of Climate Change for Australian Fisheries and Aquaculture: a preliminary assessment</i> . Report to the Department of Climate Change, Canberra, Australia. August.                                                                               |
| Hoegh-Guldberg, O., 1999. Climate change, coral bleaching and the future of the world's coral reefs. <i>Marine &amp; Freshwater Research</i> , <b>50</b> (8), 839–866.                                                                                                                                                              |
| Hoegh-Guldberg, H. Hoegh-Guldberg, O. 2004. <i>The Implications of Climate Change for Australia's Great Barrier Reef: People and Industries at Risk</i> . World Wildlife Fund and Queensland Tourism Industry Council, Brisbane.                                                                                                    |
| Hoegh-Guldberg, O., et al., 2007. Coral Reefs under Rapid Climate Change and Ocean Acidification. <i>Science</i> , <b>318</b> (5857), 1737-1742.                                                                                                                                                                                    |
| Holper, P., et al., 2006, Infrastructure and climate change risk assessment for Victoria, CSIRO, Aspendale                                                                                                                                                                                                                          |
| Houghton, R. 2007. Balancing the global carbon budget. <i>Annual Review Earth Planetary Science</i> <b>35</b> , 313–347                                                                                                                                                                                                             |
| Howden, S. et al., 2007. Adapting agriculture to climate change. <i>Proceedings of the National Academy of Sciences</i> , <b>104</b> (50), 19691.                                                                                                                                                                                   |
| Hughes, L., 2003. Climate change and Australia: Trends, projections and impacts. <i>Austral Ecology</i> , <b>28</b> (4), 423-443.                                                                                                                                                                                                   |
| Hulme, M. and Dessai, S., 2008. Predicting, deciding, learning: can one evaluate the 'success' of national climate scenarios? <i>Environmental Research Letters</i> , <b>3</b> , 045013.                                                                                                                                            |
| Hüppop, O and Hüppop, 2003. North Atlantic Oscillation and timing of spring migration in birds. <i>Proceedings of the Royal Society of London. Series B: Biological Sciences</i> , <b>270</b> (1512), 233                                                                                                                           |
| Hutchings, P. et al., 2007. Vulnerability of benthic invertebrates of the Great Barrier Reef to climate change. <i>Climate Change and the Great Barrier Reef: A Vulnerability Assessment</i> , 309–356                                                                                                                              |
| <a href="http://www.ipcc.ch">IPCC, Climate Change 2007: The Physical Science Basis. Summary for Policy makers. Available at: http://www.ipcc.ch.</a>                                                                                                                                                                                |
| Jokiel, P. and Coles, S. 1977. Effects of temperature on photosynthesis and respiration in hermatypic corals. <i>Marine Biology</i> , <b>43</b> (3), 209–216.                                                                                                                                                                       |
| Jones, L., 2010. Overcoming social barriers to climate change adaptation. Available at: <a href="http://www.odi.org.uk/resources/details.asp?id=4945&amp;title=social-barriers-climate-change-adaptation-nepal">http://www.odi.org.uk/resources/details.asp?id=4945&amp;title=social-barriers-climate-change-adaptation-nepal</a> . |
| Kandlikar, M. and Risbey, J., 2000. Agricultural Impacts of Climate Change: If Adaptation is the Answer, What is the Question? <i>Climatic Change</i> , <b>45</b> (3), 529–539.                                                                                                                                                     |
| Keating, B. and Carberry, P. 2010. Emerging opportunities and challenges for Australian Broadacre agriculture. <i>Crop and Pasture Science</i> , <b>61</b> , 269–278.                                                                                                                                                               |
| Kerswell, A. and Jones, R. 2003. Effects of hypo-osmosis on the coral <i>Stylophora pistillata</i> : nature and cause of 'low-salinity bleaching'. <i>Marine Ecology Progress Series</i> , <b>253</b> , 145–154.                                                                                                                    |
| King, B. 1985. Seabird islands: Michaelmas Cay, Great Barrier Reef, Queensland. <i>Corella</i> , <b>9</b> , 94–96. Can't get this one, old journal- quoted in vulnerability assessment                                                                                                                                              |
| Kingsford, M. and Welch, D. 2007. Vulnerability of pelagic systems of the Great Barrier Reef to climate change. <i>Climate Change and the Great Barrier Reef</i> pp 556–592.                                                                                                                                                        |
| Klein, R. Nicholls, R. and Mimura, N. 1999. Coastal adaptation to climate change: can the IPCC Technical Guidelines be applied? <i>Mitigation and Adaptation Strategies for Global Change</i> , <b>4</b> (3), 239–252.                                                                                                              |
| Kleypas, J. and Langdon, C. 2006. Coral reefs and changing seawater carbonate chemistry. <i>Coral reefs and climate change: science and management. Coast Estuar Stud</i> , <b>61</b> , 73–110.                                                                                                                                     |
| Kuleshov, Y. 2003. Tropical cyclone climatology for the Southern Hemisphere. Part I: Spatial and temporal profiles of tropical cyclones in the Southern Hemisphere. National Climate Center, Commonwealth Bureau of Meteorology.                                                                                                    |
| Kurihara, H. and Shirayama, Y. 2004. Effects of increased atmospheric CO <sub>2</sub> on sea urchin early development. <i>Marine Ecology Progressive Series</i> , <b>274</b> , 161–169.                                                                                                                                             |

|                                                                                                                                                                                                                                                                                                                                                                                                                                           |
|-------------------------------------------------------------------------------------------------------------------------------------------------------------------------------------------------------------------------------------------------------------------------------------------------------------------------------------------------------------------------------------------------------------------------------------------|
| Kushmaro, A. et al., 1996. Bacterial infection and coral bleaching. <i>Nature</i> , <b>380</b> (6573), 396.                                                                                                                                                                                                                                                                                                                               |
| Larson, S. and Stone-Jovicich, S., 2008. Community perceptions of water quality and current institutional arrangements in the Great Barrier Reef region of Australia. In Proceedings of the 13th International Water Resources Association World Water Congress. Montpellier, France. pp. 1–4.                                                                                                                                            |
| Lédée, E. J. I., et al., 2012. Responses and adaptation strategies of commercial and charter fishers to zoning changes in the Great Barrier Reef Marine Park. <i>Marine Policy</i> <b>36</b> : 226–234                                                                                                                                                                                                                                    |
| Lesser, M. et al., 1990. Bleaching in coral reef anthozoans: effects of irradiance, ultraviolet radiation, and temperature on the activities of protective enzymes against active oxygen. <i>Coral Reefs</i> , <b>8</b> (4), 225–232.                                                                                                                                                                                                     |
| Le Treut, et al. 2007. <i>Historical overview of climate change</i> . In: S. Solomon, D. Qin, M. Manning, Z. Chen, M. Marquis, K.B. Averyt, M. Tignor and H.L. Miller, Editors, Climate Change 2007 – The Physical Science Basis. Contribution of Working Group I to the Fourth Assessment Report of the Intergovernmental Panel on Climate Change, Cambridge University Press, Cambridge, United Kingdom and New York (2007), pp. 93–127 |
| Limpus, C.J. et al., 2003. The green turtle, <i>Chelonia mydas</i> , population of Raine Island and the northern Great Barrier Reef: 1843-2001. <i>Memoirs: Queensland Museum</i> , <b>49</b> (1), 349–440.                                                                                                                                                                                                                               |
| Longstaff, B.J. and Dennison, W.C., 1999. Seagrass survival during pulsed turbidity events: the effects of light deprivation on the seagrasses <i>Halodule pinifolia</i> and <i>Halophila ovalis</i> . <i>Aquatic Botany</i> , 65(1-4), 105–121                                                                                                                                                                                           |
| Lough, J. et al., 2006. The Great Barrier Reef and Climate Change. <i>Bulletin Australian Meteorological and Oceanographic Society</i> , <b>19</b> , 53–58.                                                                                                                                                                                                                                                                               |
| Lorenzoni, I., Nicholson-Cole, S. and Whitmarsh, L., 2007. Barriers perceived to engaging with climate change among the UK public and their policy implications. <i>Global Environmental Change</i> , <b>17</b> (3-4), 445–459.                                                                                                                                                                                                           |
| Lough, J., 2007. Climate and climate change on the Great Barrier Reef. <i>Climate Change and the Great Barrier Reef</i> , 15–50.                                                                                                                                                                                                                                                                                                          |
| Lovelock, C. and Ellison, J. 2007. Vulnerability of mangroves and tidal wetlands of the Great Barrier Reef to climate change. Climate change and the Great Barrier Reef. Great Barrier Reef Marine Park Authority and the Australian Greenhouse Office, Australia 238-269.                                                                                                                                                                |
| McCarthy, J. 2001. Climate change 2001: impacts, adaptation, and vulnerability: contribution of Working Group II to the third assessment report of the Intergovernmental Panel on Climate Change, Cambridge Univ Pr.                                                                                                                                                                                                                      |
| McCook, L.J. et al., 2007. <i>Ecological resilience, climate change and the Great Barrier Reef</i> . Johnson, JE and PA Marshall. Climate change and the Great Barrier Reef. Great Barrier Reef Marine Park Authority and the Australian Greenhouse Office. Townsville, Australia, 75–96.                                                                                                                                                 |
| Macinnis-Ng, C.M. and Ralph, P.J., 2003. Short-term response and recovery of <i>Zostera capricorni</i> photosynthesis after herbicide exposure. <i>Aquatic Botany</i> , <b>76</b> (1), 1–15                                                                                                                                                                                                                                               |
| McIlgorm, A. et al., 2010. How will climate change alter fishery governance Insights from seven international case studies. <i>Marine Policy</i> , <b>34</b> (1), 170–177.                                                                                                                                                                                                                                                                |
| McKinnon, A. et al., 2007. <i>Vulnerability of Great Barrier Reef plankton to climate change</i> . Climate Change and the Great Barrier Reef, Great Barrier Reef Marine Park Authority and the Australian Greenhouse Office, Australia pp121–152.                                                                                                                                                                                         |
| McMichael, A. Woodruff, R. and Hales, S. 2006. Climate change and human health: present and future risks. <i>The Lancet</i> , <b>367</b> (9513), 859–869.                                                                                                                                                                                                                                                                                 |
| Mahon, R., 2002. <i>Adaptation of fisheries and fishing communities to the impacts of climate change in the CARICOM region</i> . Mainstreaming Adaptation to Climate Change (MACC) of the Caribbean Center for Climate Change (CCCC), Organization of American States, Washington, D. C., pp. 33                                                                                                                                          |
| Marshall, P.A. and Johnson, J., 2007. <i>The Great Barrier Reef and climate change: vulnerability and management implications</i> . Climate change and the Great Barrier Reef. Great Barrier Reef Marine Park Authority and the Australian Greenhouse Office, Australia, pp 774–801.                                                                                                                                                      |

|                                                                                                                                                                                                                                                                                                                                                                                                                        |
|------------------------------------------------------------------------------------------------------------------------------------------------------------------------------------------------------------------------------------------------------------------------------------------------------------------------------------------------------------------------------------------------------------------------|
| Marriott, R.J., Mapstone, B.D. and Begg, G.A., 2007. Age-specific demographic parameters, and their implications for management of the red bass, <i>Lutjanus bohar</i> (Forsskal 1775): a large, long-lived reef fish. <i>Fisheries Research</i> , <b>83</b> (2-3), 204–215                                                                                                                                            |
| Maunsell Australia Pty Ltd 2008, Impact of Climate Change on Infrastructure in Australia and CGE Model Inputs for the Garnaut Climate Change Review, Maunsell Australia Pty Ltd, Melbourne.                                                                                                                                                                                                                            |
| Meehl, G.A., et al., 2007: <i>Global Climate Projections</i> . In: Climate Change 2007: The Physical Science Basis. Contribution of Working Group I to the Fourth Assessment Report of the Intergovernmental Panel on Climate Change [Solomon, S.D. Qin, M. Manning, Z. Chen, M. Marquis, K.B. Averyt, M. Tignor and H.L. Miller (eds.)]. Cambridge University Press, Cambridge, United Kingdom and New York, NY, USA. |
| Menzel, A. and Fabian, P., 1999. Growing season extended in Europe. <i>Nature</i> , <b>397</b> (6721), 659–659.                                                                                                                                                                                                                                                                                                        |
| Millien, V. et al., 2006. Ecotypic variation in the context of global climate change: revisiting the rules. <i>Ecology letters</i> , <b>9</b> (7), 853–869.                                                                                                                                                                                                                                                            |
| Mimura, N., 1999. Vulnerability of island countries in the South Pacific to sea level rise and climate change. <i>Climate research</i> , <b>12</b> , 137–143.                                                                                                                                                                                                                                                          |
| Moise, A. et al. 2005. Coupled model simulations of Australian surface precipitation and temperature and their response to global warming in 18 CMIP2 models, Bureau of Meteorology.                                                                                                                                                                                                                                   |
| Morris, J.T. et al., 2002. Responses of coastal wetlands to rising sea level. <i>Ecology</i> , <b>83</b> (10), 2869–2877.                                                                                                                                                                                                                                                                                              |
| Munday, P.L. et al., 2008. Climate change and the future for coral reef fishes. <i>Fish and Fisheries</i> , <b>9</b> (3), 261–285.                                                                                                                                                                                                                                                                                     |
| Munday, P.L. et al., 2007. Vulnerability of fishes of the Great Barrier Reef to climate change. <i>Climate Change and the Great Barrier Reef</i> , pp357–391.                                                                                                                                                                                                                                                          |
| Mumby, P. J., et al., 2006. Fishing, trophic cascades and the process of grazing on coral reefs. <i>Science</i> . 311 (5757): 98-101.                                                                                                                                                                                                                                                                                  |
| National Tidal Centre and Bureau of Meteorology, 2006. The Australian Baseline Sea Level Monitoring Project: Monthly data report.                                                                                                                                                                                                                                                                                      |
| Negri, A. Marshall, P. and Heyward, A. 2007. Differing effects of thermal stress on coral fertilization and early embryogenesis in four Indo Pacific species. <i>Coral reefs</i> , <b>26</b> (4), 759–763.                                                                                                                                                                                                             |
| Nicholls, N. 2006. Detecting and attributing Australian climate change: a review. <i>Australian Meteorological Magazine</i> , <b>55</b> (3), 199–211.                                                                                                                                                                                                                                                                  |
| Nicholls, R.J. and Mimura, N., 1998. Regional issues raised by sea-level rise and their policy implications. <i>Climate Research</i> , <b>11</b> , 5–18.                                                                                                                                                                                                                                                               |
| Nilsson, J. A., Sutton, S. G. and Tobin, R. C. 2009. <i>A Community Survey of Climate Change and the Great Barrier Reef</i> . Marine and Tropical Sciences Research Facility (MTSRF) Research Report Series. Reef and Rainforest Research Centre Limited, Cairns (85pp.).                                                                                                                                              |
| NOAA/ESRL, 2009.<br>< <a href="http://www.esrl.noaa.gov/gmd/ccgg/trends/co2_data_mlo.html">http://www.esrl.noaa.gov/gmd/ccgg/trends/co2_data_mlo.html</a> >.                                                                                                                                                                                                                                                           |
| Nott, J. and Hayne, M. 2001. High frequency of 'super-cyclones' along the Great Barrier Reef over the past 5000 years. <i>Nature</i> , <b>413</b> (6855), 508-512.                                                                                                                                                                                                                                                     |
| O'Neill, B.C. and Oppenheimer, M., 2002. Climate change: dangerous climate impacts and the Kyoto Protocol. <i>Science</i> , <b>296</b> (5575), 1971.                                                                                                                                                                                                                                                                   |
| Orth, R.J. et al., 2006. A global crisis for seagrass ecosystems. <i>Bioscience</i> , <b>56</b> (12), 987–996.                                                                                                                                                                                                                                                                                                         |
| Oschlies, A. et al., 2008. Simulated 21st century's increase in oceanic suboxia by CO <sub>2</sub> -enhanced biotic carbon export. <i>Global biogeochemical cycles</i> , <b>22</b> .                                                                                                                                                                                                                                   |
| Ostrom, E. et al., 1999. Revisiting the commons: local lessons, global challenges. <i>Science</i> , <b>284</b> (5412), 278.                                                                                                                                                                                                                                                                                            |
| OzEstuaries, 2010. Accessed online at <a href="http://dbforms.ga.gov.au/pls/www/npm.ozest.pubs_reports-">http://dbforms.ga.gov.au/pls/www/npm.ozest.pubs_reports-</a>                                                                                                                                                                                                                                                  |

|                                                                                                                                                                                                                                                                                                                                                 |
|-------------------------------------------------------------------------------------------------------------------------------------------------------------------------------------------------------------------------------------------------------------------------------------------------------------------------------------------------|
| Parmesan, C. and Yohe, G. 2003. A globally coherent fingerprint of climate change impacts across natural systems. <i>Nature</i> , <b>421</b> (6918), 37–42.                                                                                                                                                                                     |
| Partridge, I., 1994. Will it rain? The effects of the Southern Oscillation and El Nino on Australia. Information Series-Queensland Department of Primary Industries (Australia).                                                                                                                                                                |
| Pears, R.J. et al., 2006. Demography of a large grouper, <i>Epinephelus fuscoguttatus</i> , from Australia's Great Barrier Reef: implications for fishery management. <i>Marine Ecology Progress Series</i> , <b>307</b> , 259–272.                                                                                                             |
| Pereira, H. M., et al., 2010. Scenarios for Global Biodiversity in the 21st Century. <i>Science</i> : 1496-1501.                                                                                                                                                                                                                                |
| Perry, A.L. et al., 2005. Climate change and distribution shifts in marine fishes. <i>Science</i> , <b>308</b> (5730), 1912.                                                                                                                                                                                                                    |
| Pethick, J., 1993. Shoreline adjustments and coastal management: physical and biological processes under accelerated sea-level rise. <i>Geographical journal</i> , <b>159</b> (2), 162–168.                                                                                                                                                     |
| Pittock, A.B. and Jones, R.N., 2000. Adaptation to what and why? <i>Environmental Monitoring and Assessment</i> , 61(1), 9–35.                                                                                                                                                                                                                  |
| Poloczanska, E. S., Hobday, A. J. and Richardson, A. J. (eds) 2008. 'In Hot Water: preparing for climate change in Australia's coastal and marine systems', proceedings of conference held in Brisbane, 12-14th November 2007, CSIRO Marine and Atmospheric Research, Hobart, Tasmania, Australia                                               |
| Pollard, P.C. and Greenway, M., 1999. Photosynthetic characteristics of seagrasses <i>Cymodocea serrulata</i> , <i>Thalassia hemprichii</i> and <i>Zostera capricornia</i> ) in a low-light environment, with a comparison of leaf-marking and lacunal-gas measurements of productivity. <i>Marine and Freshwater Research</i> , 44(1), 127–139 |
| Power, S. et al., 1999. Decadal climate variability in Australia during the twentieth century. <i>International Journal of Climatology</i> , <b>19</b> (2), 169–184.                                                                                                                                                                            |
| Puotinen, M. Done, T. and Skelly, W. 1997. An atlas of tropical cyclones in the Great Barrier Reef Region, 1969-1997, CRC Reef Research Centre. Available online at <a href="http://www.reef.crc.org.au/publications/techreport/TechRep19.html">http://www.reef.crc.org.au/publications/techreport/TechRep19.html</a>                           |
| Queensland Primary Industries and Fisheries, 2009. Annual Status Report: Coral Reef Finfish Fishery. Department of Department of Employment, Education and Innovation, State of Queensland, 2008                                                                                                                                                |
| Rahmstorf, S., 2010. A new view on sea level rise. <i>Nature Reports Climate Change</i> , ( <b>1004</b> ), 44-45.                                                                                                                                                                                                                               |
| Raven, J. et al., 2005. Ocean acidification due to increasing atmospheric carbon dioxide. <i>Coral Reefs</i> . <b>12</b> . P60                                                                                                                                                                                                                  |
| Reeder, T., Lorenzoni, I. & O'Brian, K.L., 2009. Protecting London from tidal flooding: limits to engineering adaptation. In <i>Adapting to Climate Change Thresholds, Values, Governance</i> . pp. 54- 63.                                                                                                                                     |
| Richardson, A.J. and Poloczanska, E.S. 2009. <i>Australia's Oceans</i> . In A Marine Climate Change Impacts and Adaptation Report Card for Australia 2009 (Eds. E.S. Poloczanska, A.J. Hobday and A.J. Richardson), NCCARF Publication 05/09.                                                                                                   |
| Risbey, J. et al., 1999. Scale, context, and decision making in agricultural adaptation to climate variability and change. <i>Mitigation and Adaptation Strategies for Global Change</i> , <b>4</b> (2), 137–165.                                                                                                                               |
| Roemmich, D. et al., 2007. Decadal spinup of the South Pacific subtropical gyre. <i>Journal of Physical Oceanography</i> , <b>37</b> (2), 162–173.                                                                                                                                                                                              |
| Russell, M. 2001. Spawning Aggregations of Reef Fishes on the Great Barrier Reef: Implications for Management. Great Barrier Reef Marine Park Authority, Commonwealth of Australia: 37pp                                                                                                                                                        |
| Sabine, C. et al. 2004. The oceanic sink for anthropogenic CO <sub>2</sub> . <i>Science</i> , <b>305</b> (5682), 367.                                                                                                                                                                                                                           |
| Schaffelke, B., Mellors, J. and Duke, N.C., 2005. Water quality in the Great Barrier Reef region: responses of mangrove, seagrass and macroalgal communities. <i>Marine Pollution Bulletin</i> , 51(1-4), 279–296.                                                                                                                              |

|                                                                                                                                                                                                                                                                                                           |
|-----------------------------------------------------------------------------------------------------------------------------------------------------------------------------------------------------------------------------------------------------------------------------------------------------------|
| Scheffer, M. et al., 2001. Catastrophic shifts in ecosystems. <i>Nature</i> , <b>413</b> (6856), 591–596.                                                                                                                                                                                                 |
| Scheraga, J.D. and Grambsch, A.E., 1998. Risks, opportunities and adaptation to climate change. <i>Climate Research</i> , <b>11</b> , 85–95.                                                                                                                                                              |
| Scott, D. and McBoyle, G., 2007. Climate change adaptation in the ski industry. <i>Mitigation and Adaptation Strategies for Global Change</i> , <b>12</b> (8), 1411–1431.                                                                                                                                 |
| Shaish, L. et al., 2010. Coral Reef Restoration (Bolinao, Philippines) in the Face of Frequent Natural Catastrophes. <i>Restoration Ecology</i> , <b>18</b> (3), 285-299.                                                                                                                                 |
| Sheaves, M. et al., 2007. Vulnerability of coastal and estuarine habitats in the Great Barrier Reef to climate change. Climate Change and the Great Barrier Reef Marine Park: a Vulnerability Assessment. Townsville, Great Barrier Reef Marine Park Authority and Australian Greenhouse Office, 593–620. |
| Sheaves, M. et al., 2006. Contribution of floodplain wetland pools to the ecological functioning of the Fitzroy River Estuary.                                                                                                                                                                            |
| Sheehan, P. et al., 2008. Climate change and the new world economy: implications for the nature and timing of policy responses. <i>Global Environmental Change</i> , <b>18</b> (3), 380–396.                                                                                                              |
| Sherman, R.E., Fahey, T.J. and Martinez, P., 2001. Hurricane impacts on a mangrove forest in the Dominican Republic: damage patterns and early recovery. <i>Biotropica</i> , <b>33</b> (3), 393–408                                                                                                       |
| Siegenthaler, U. et al., 2005. Stable carbon cycle-climate relationship during the late Pleistocene. <i>Science</i> , <b>310</b> (5752), 1313.                                                                                                                                                            |
| Smit, B. and Pilifosova, O., 2001. Adaptation to climate change in the context of sustainable development and equity. <i>Sustainable Development</i> , <b>8</b> (9), 9–28.                                                                                                                                |
| Smit, B. and Skinner, M.W., 2002. Adaptation options in agriculture to climate change: a typology. <i>Mitigation and adaptation strategies for global change</i> , <b>7</b> (1), 85–114.                                                                                                                  |
| Smith, I.N., 2004. Trends in Australian rainfall-are they unusual. <i>Australian Meteorological Magazine</i> , <b>53</b> (3), 163–173.                                                                                                                                                                    |
| Smith, J.B. and Lenhart, S.S., 1996. Climate change adaptation policy options. <i>Climate Research</i> , <b>6</b> , 193–201.                                                                                                                                                                              |
| Smith, T.J. et al., 1994. Mangroves, hurricanes, and lightning strikes. <i>Bioscience</i> , <b>44</b> (4), 256–262.                                                                                                                                                                                       |
| Soares, M.L.G., 2009. A Conceptual Model for the Responses of Mangrove Forests to Sea Level Rise. <i>Journal of coastal research</i> , <b>20</b> (2): 286-598                                                                                                                                             |
| Solomon, S. et al. 2007. Climate change 2007: the physical science basis, University Press.                                                                                                                                                                                                               |
| Sparks, T.H., Roy, D.B. and Dennis, R.L.H., 2005. The influence of temperature on migration of Lepidoptera into Britain. <i>Global Change Biology</i> , <b>11</b> (3), 507–514.                                                                                                                           |
| State of Queensland (Department of the Premier and Cabinet), 2009. Reef Water Quality Protection Plan 2009 for the Great Barrier Reef World Heritage Area and adjacent catchments, Brisbane: Reef Water Quality Protection Plan Secretariat.                                                              |
| Steinberg, C. 2007. Impacts of climate change on the physical oceanography of the Great Barrier Reef. Climate Change and the Great Barrier Reef: A vulnerability Assessment. Townsville: Great Barrier Reef Marine Park Authority and Australian Greenhouse Office, pp52–74.                              |
| Stokes, C. et al., 2005. OzFACE: the Australian savanna free air CO <sub>2</sub> enrichment facility and its relevance to carbon-cycling issues in a tropical savanna. <i>Australian Journal of Botany</i> , <b>53</b> (7), 677–688.                                                                      |
| Strong, A.E. et al., 1997. Improved satellite techniques for monitoring coral reef bleaching. In <i>Proceedings of the Eighth International Coral Reef Symposium</i> . pp. 1495–1498.                                                                                                                     |
| Sutton, S.G. and Tobin, R.C., 2009. Recreational fishers' attitudes towards the 2004 rezoning of the Great Barrier Reef Marine Park. <i>Environmental Conservation</i> , <b>36</b> (03), 245–252.                                                                                                         |
| The World Bank, 2006. Clean Energy and Development: Towards an Investment Framework, Environmentally and Socially Sustainable Development Vice Presidency Infrastructure Vice Presidency.                                                                                                                 |
| Thomas, C.D. and Lennon, J.J., 1999. Birds extend their ranges northwards. <i>Nature</i> , <b>399</b> , 213.                                                                                                                                                                                              |

|                                                                                                                                                                                                                                                                                                                                                                                        |
|----------------------------------------------------------------------------------------------------------------------------------------------------------------------------------------------------------------------------------------------------------------------------------------------------------------------------------------------------------------------------------------|
| Tobin, A. et al., 2010. <i>Adapting to change: minimising uncertainty about the effects of rapidly-changing environmental conditions on the Queensland Coral Reef Fin Fish Fishery</i> . Final Report to the Fisheries Research & Development Corporation, Project 2008/103. Fishing and Fisheries Research Centre Technical Report No. 11, James Cook University, Australia pp 1-172. |
| Trenberth, K. et al., 2007. <i>Observations: Surface and Atmospheric Climate Change</i> . In Climate Change 2007: The Physical Science Basis. Contribution of Working Group I to the Fourth Assessment Report of the Intergovernmental Panel on Climate Change.                                                                                                                        |
| Tol, R.S., 2007. The double trade-off between adaptation and mitigation for sea level rise: an application of FUND. <i>Mitigation and Adaptation Strategies for Global Change</i> , <b>12</b> (5), 741–753.                                                                                                                                                                            |
| Tol, R.S., Klein, R.J. and Nicholls, R.J., 2009. Towards successful adaptation to sea-level rise along Europe's coasts. <i>Journal of Coastal Research</i> , <b>24</b> (2), pp432-442                                                                                                                                                                                                  |
| Tompkins, E.L. and Adger, W.N., 2004. Building resilience to climate change through adaptive management of natural resources. <i>Ecology and Society</i> . <b>9</b> (2): article 10                                                                                                                                                                                                    |
| Tompkins, E.L. et al., 2009. An Inventory of Adaptation to climate change in the UK: challenges and findings. <i>Tyndall Centre for Climate Change Research Working Paper</i> , pp <b>135</b>                                                                                                                                                                                          |
| Tourism Australia, 2008- Steiner, E. (Data to 31/03/2008), Consumer and Market Insights, Brand health and communications tracking excerpt: attitudes to climate change. Published by Tourism Australia.                                                                                                                                                                                |
| Tubiello, F.N. et al., 2000. Effects of climate change and elevated CO <sub>2</sub> on cropping systems: model predictions at two Italian locations. <i>European Journal of Agronomy</i> , <b>13</b> (2-3), 179–189.                                                                                                                                                                   |
| Tubiello, F.N., Soussana, J.F. and Howden, S.M., 2007. Crop and pasture response to climate change. <i>Proceedings of the National Academy of Sciences</i> , <b>104</b> (50), 19686.                                                                                                                                                                                                   |
| Vandenbosch, R., 2000. Effects of ENSO and PDO Events on Seabird Populations as Revealed by Christmas Bird Count Data. <i>Waterbirds: The International Journal of Waterbird Biology</i> , <b>23</b> (3), pp.416-422.                                                                                                                                                                  |
| Veron, J. et al., 2009. The coral reef crisis: The critical importance of <350 ppm CO <sub>2</sub> . <i>Marine Pollution Bulletin</i> , <b>58</b> (10), 1428-1436.                                                                                                                                                                                                                     |
| Verspagen, J.M. et al., 2006. Water management strategies against toxic Microcystis blooms in the Dutch delta. <i>Ecological applications</i> , <b>16</b> (1), 313–327.                                                                                                                                                                                                                |
| Viner, D. and Agnew, M., 1999. Climate change and its impacts on tourism, Climatic Research Unit, University of East Anglia.                                                                                                                                                                                                                                                           |
| Visser, M.E. and Holleman, L.J., 2001. Warmer springs disrupt the synchrony of oak and winter moth phenology. <i>Proceedings of the Royal Society of London. Series B: Biological Sciences</i> , <b>268</b> (1464), 289.                                                                                                                                                               |
| Walsh, K.J.E. et al., 2010. Using sea level rise projections for urban planning in Australia. <i>Journal of Coastal Research</i> . <b>20</b> (2): pp. 586 – 598.                                                                                                                                                                                                                       |
| Walsh, K. et al., 2004. Climate change in Queensland under enhanced greenhouse conditions. <i>Final Report</i> .                                                                                                                                                                                                                                                                       |
| Walther, G. et al., 2002. Ecological responses to recent climate change. <i>Nature</i> , <b>416</b> : 389-395                                                                                                                                                                                                                                                                          |
| Walters, C. and Parma, A.M., 1996. Fixed exploitation rate strategies for coping with effects of climate change. <i>Canadian Journal of Fisheries and Aquatic Sciences</i> , <b>53</b> (1), 148–158.                                                                                                                                                                                   |
| Watson, A. and Orr, J. 2003. Carbon dioxide fluxes in the global ocean. <i>Ocean Biogeochemistry</i> , 123–143.                                                                                                                                                                                                                                                                        |
| Waycott, M. et al., 2009. Accelerating loss of seagrasses across the globe threatens coastal ecosystems. <i>Proceedings of the National Academy of Sciences</i> , <b>106</b> (30), 12377.                                                                                                                                                                                              |
| Waycott, M. et al., 2007. <i>Vulnerability of seagrasses in the Great Barrier Reef to climate change</i> . Climate Change and the Great Barrier Reef: A Vulnerability Assessment. Great Barrier Reef Marine Park Authority, Townsville, Australia, pp193–235.                                                                                                                          |

|                                                                                                                                                                                                                                                                                                                              |
|------------------------------------------------------------------------------------------------------------------------------------------------------------------------------------------------------------------------------------------------------------------------------------------------------------------------------|
| Waycott, M., Longstaff, B.J. and Mellors, J., 2005. Seagrass population dynamics and water quality in the Great Barrier Reef region: A review and future research directions. <i>Marine Pollution Bulletin</i> , <b>51</b> (1-4), 343–350.                                                                                   |
| Webster, N. and Hill, R. 2007. Vulnerability of marine microbes on the Great Barrier Reef to climate change. Climate Change and the Great Barrier Reef Marine Park: a Vulnerability Assessment J. E. Johnson and PA Marshall. Townsville, Great Barrier Reef Marine Park Authority and Australian Greenhouse Office, 97–115. |
| Whetton, P. et al. 2005. Australian climate change projections for impact assessment and policy application: a review. <i>CSIRO Marine and Atmospheric Research Paper</i> , 001, 34p.                                                                                                                                        |
| White, D.H. and Karssies, L., 1999. Australia's National Drought Policy. <i>Water International</i> , <b>24</b> (1), 2–9.                                                                                                                                                                                                    |
| Wieters, E. et al., 2003. Alongshore and temporal variability in chlorophyll a concentration in Chilean nearshore waters. <i>Marine Ecology Progress Series</i> , <b>249</b> , 93–105.                                                                                                                                       |
| Williams LE. 2002. Queensland's Fisheries Resources. Current Condition and Recent Trends 1988-2000. Department of Primary Industries and Fisheries, Brisbane, Australia.                                                                                                                                                     |
| Wood, C. and McDonald, D. 1997. Global warming: implications for freshwater and marine fish, Cambridge Univ Pr.                                                                                                                                                                                                              |
| Woodroffe, C. et al., 1999. Atoll reef-island formation and response to sea-level change: West Island, Cocos (Keeling) Islands. <i>Marine Geology</i> , <b>160</b> (1-2), 85–104.                                                                                                                                            |
| Wooldridge, S.A., 2010. Is the coral-algae symbiosis really ‘mutually beneficial’ for the partners? <i>BioEssays</i> , <b>32</b> (7), 615–625.                                                                                                                                                                               |
| Wooldridge, S.A. and Done, T.J., 2009. Improved water quality can ameliorate effects of climate change on corals. <i>Ecological Applications</i> , <b>19</b> (6), 1492–1499.                                                                                                                                                 |
| Wooldridge, S. et al., 2005. Precursors for resilience in coral communities in a warming climate: a belief network approach. <i>Marine Ecology Progress Series</i> - <b>295</b> , 157-169                                                                                                                                    |
| Zamani, G. Gorgievski-Duijvesteijn, M. Zarafshani, K. 2006. Coping with drought: towards a multilevel understanding based on conservation of resources theory. <i>Human Ecology</i> <b>34</b> , 677–692.                                                                                                                     |
